# Supplementary material for: Facile preparation of graphitic-C3N4 quantum dots for application in two-photon imaging
Source: Royal Society of Chemistry journal article supplement (doi:10.1039/c8nj05740k), 2019-01-01
Supplement: c8nj05740k1.pdf [file c8nj05740k1.pdf]

## Facile preparation of graphitic-C<sub>3</sub>N<sub>4</sub> quantum dots for application in two-photon imaging

Lingyan Yang,<sup>1,2</sup> Xiaoxia Wu,<sup>1,2</sup> Liang Luo,<sup>3</sup> Yong Liu,<sup>4</sup> Fu Wang<sup>1\*</sup>

<sup>1</sup> Laboratory of Environmental Sciences and Technology, Xinjiang Technical Institute of Physics & Chemistry, Chinese Academy of Sciences, Urumqi, Xinjiang 830011, China

<sup>2</sup> University of Chinese Academy of Sciences, No. 19 Yuquan Road, Beijing 100049, China

<sup>3</sup> Grirem advanced materials Co., Ltd., 43 North Third Ring Road, 100000 Beijing, China

<sup>4</sup> Department of Radiation Oncology, Shanghai General Hospital, Shanghai Jiao Tong University School of Medicine, Shanghai 201620, China

### S1. The Raman spectra of g-C<sub>3</sub>N<sub>4</sub> quantum dots

In order to further study the structure of g-C<sub>3</sub>N<sub>4</sub> QDs (quantum dots), the Raman spectra were carried out. We measured the Raman spectra of g-C<sub>3</sub>N<sub>4</sub> QDs in the aqueous solution. From the result shown in the Figure S1, we can see the band at about 1637 cm<sup>-1</sup> which was attributable to C=N stretching vibration [1-3]. Apart from this band, we can't find another one, even if we change the wavelength of laser in Confocal Raman spectrometer from 534nm to 780nm. In part, this result was due to the size of g-C<sub>3</sub>N<sub>4</sub> QDs that is too small [4].

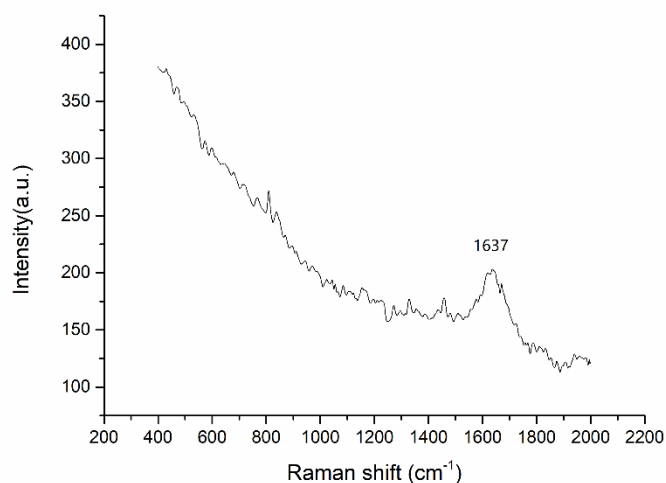

Figure S1 The Raman spectra of g-C<sub>3</sub>N<sub>4</sub> QDs

### S2. The water stability of nanoparticles in PBS and dulbecco's modified eagle medium

The fluorescence intensity of the g-C<sub>3</sub>N<sub>4</sub> QDs in PBS and DMEM (dulbecco's modified eagle medium) at 0, 2, 6, 8, 12, 24 h was measured to study the water stability of nanoparticles. It showed no significant change within 24 h, and the fluorescence intensity of the g-C<sub>3</sub>N<sub>4</sub> QDs was more than 90% after 8 h which indicated that g-C<sub>3</sub>N<sub>4</sub> QDs were stable in the experimental process.

\*Corresponding authors Email: wangfu@sjtu.edu.cn

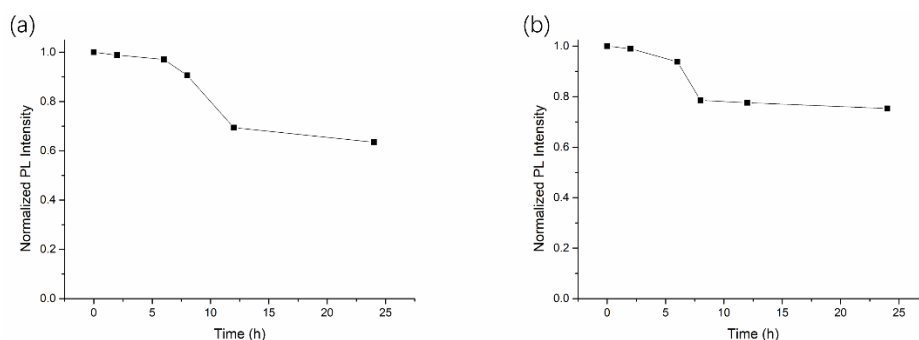

**Figure S2** Fluorescence intensity of the g-C<sub>3</sub>N<sub>4</sub> QDs in PBS (a) and DMEM (b) in 24 h.

### S3. Toxicity studies

To measure the toxicity of the g-C<sub>3</sub>N<sub>4</sub> QDs in longer time, an MTT assay was used on the MCF-7 cells. Viability of MCF-7 cells after 48 and 72 h of incubation with different concentrations of g-C<sub>3</sub>N<sub>4</sub> QDs in vitro is shown in Figure S3. As we can see, g-C<sub>3</sub>N<sub>4</sub> QDs have little effect on cell viability which confirmed non-toxic g-C<sub>3</sub>N<sub>4</sub> QDs.

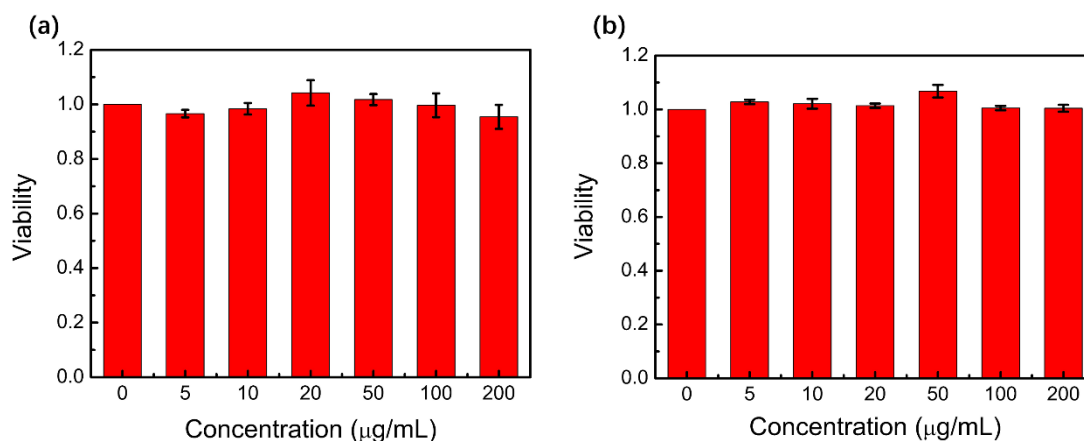

**Figure S3** Viability of MCF-7 cells after 48 h (a) and 72 h (b) of incubation with different concentrations of g-C<sub>3</sub>N<sub>4</sub> QDs.

### References

- 1 J. Jiang, L. Ou-yang, L. Zhu, A. Zheng, J. Zou, X. Yi, H. Tang, *Carbon*, 2014, **80**, 213.
- 2 Q. Wan, M. Liu, L. Mao, R. Jiang, D. Xu, H. Huang, Y. Dai, F. Deng, X. Zhang, Y. Wei, *Mater. Sci. Eng. C*, 2017, **72**, 352.
- 3 Y. Liu, L. Mao, X. Liu, M. Liu, D. Xu, R. Jiang, F. Deng, Y. Li, X. Zhang, Y. Wei, *Mater. Sci. Eng. C*, 2017, **79**, 590-595.
- 4 B. Zhu, L. Zhang, B. Cheng, J. Yu, *Appl. Catal. B-Env.*, 2018, **224**, 983.
